# Supplementary material for: Young People’s Mental Health Changes, Risk, and Resilience During the COVID-19 Pandemic
Source: PubMed Central journal article supplement (PMC10514742; doi:10.1001/jamanetworkopen.2023.35016), 2023-09-21
Supplement: jamanetwopen-e2335016-s002.pdf [file jamanetwopen-e2335016-s002.pdf]

\*First name, last name, and suffix (if applicable) are required and will appear in PubMed.

| <b>*Group Name(s): The MYRIAD Team</b>   |                   |                              |                         |                                                                                                              |                                                 |                                                                |                                                                                                   |
|------------------------------------------|-------------------|------------------------------|-------------------------|--------------------------------------------------------------------------------------------------------------|-------------------------------------------------|----------------------------------------------------------------|---------------------------------------------------------------------------------------------------|
| <b>*First Name and Middle Initial(s)</b> | <b>*Last Name</b> | <b>*Suffix (eg, Jr, III)</b> | <b>Academic Degrees</b> | <b>Institution</b>                                                                                           | <b>Location (city, state/province, country)</b> | <b>Role or Contribution, eg, chair, principal investigator</b> | <b>Group (if more than 1 Group listed in the byline and/or Subgroup (eg, Steering Committee))</b> |
| Saz                                      | Ahmed             |                              | PhD                     | University College London                                                                                    |                                                 |                                                                |                                                                                                   |
| Louise                                   | Aukland           |                              | PGCE                    | University of Oxford                                                                                         |                                                 |                                                                |                                                                                                   |
| Susan                                    | Ball              |                              | MSc                     | University of Exeter                                                                                         |                                                 |                                                                |                                                                                                   |
| Triona                                   | Casey             |                              | MSc                     | University of Oxford                                                                                         |                                                 |                                                                |                                                                                                   |
| Catherine                                | Crane             |                              | PhD                     | University of Oxford                                                                                         |                                                 |                                                                |                                                                                                   |
| Katherine                                | De Wilde          |                              | PGCE                    | University of Oxford                                                                                         |                                                 |                                                                |                                                                                                   |
| Darren                                   | Dunning           |                              | PhD                     | University of Cambridge                                                                                      |                                                 |                                                                |                                                                                                   |
| Poushali                                 | Ganguli           |                              | MSc                     | Kings College London                                                                                         |                                                 |                                                                |                                                                                                   |
| Ben                                      | Jones             |                              | PhD                     | University of Exeter                                                                                         |                                                 |                                                                |                                                                                                   |
| Nils                                     | Kappelmann        |                              | MSc                     | Max Planck Institute of Psychiatry and International Max Planck Research School for Translational Psychiatry |                                                 |                                                                |                                                                                                   |
| Maria E.J.                               | Kempnich          |                              | PhD                     | University of Oxford                                                                                         |                                                 |                                                                |                                                                                                   |
| Konstantina                              | Komninidou        |                              | BEd                     | University of Oxford                                                                                         |                                                 |                                                                |                                                                                                   |
| Rachel                                   | Knight            |                              | MSc                     | University of Cambridge                                                                                      |                                                 |                                                                |                                                                                                   |
| Suzannah                                 | Laws              |                              | BSc                     | University of Oxford                                                                                         |                                                 |                                                                |                                                                                                   |
| Liz                                      | Lord              |                              | MSc                     | University of Oxford                                                                                         |                                                 |                                                                |                                                                                                   |
| Emma                                     | Medlicott         |                              | MSc                     | University of Oxford                                                                                         |                                                 |                                                                |                                                                                                   |
| Jenna                                    | Parker            |                              | MSc                     | University of East Anglia                                                                                    |                                                 |                                                                |                                                                                                   |
| Blanca                                   | Piera Pi-Sunyer   |                              | MSc                     | University College London                                                                                    |                                                 |                                                                |                                                                                                   |
| Isobel                                   | Pryor-Nitsch      |                              | MSc                     | University of Oxford                                                                                         |                                                 |                                                                |                                                                                                   |
| Jem                                      | Shackleford       |                              | MA, MSc                 | University of Oxford                                                                                         |                                                 |                                                                |                                                                                                   |
| Laura                                    | Taylor            |                              | PhD                     | University of Oxford                                                                                         |                                                 |                                                                |                                                                                                   |
| Brian                                    | Wainman           |                              | BEng                    | Plymouth University                                                                                          |                                                 |                                                                |                                                                                                   |
| Lucy                                     | Warriner          |                              | BSc                     | University of Cambridge                                                                                      |                                                 |                                                                |                                                                                                   |
