# Supplementary material for: Young People’s Mental Health Changes, Risk, and Resilience During the COVID-19 Pandemic
Source: PubMed Central journal article supplement (PMC10514742; doi:10.1001/jamanetworkopen.2023.35016), 2023-09-21
Supplement: jamanetwopen-e2335016-s003.pdf [file jamanetwopen-e2335016-s003.pdf]

## Data Sharing Statement

Montero-Marin. Young People's Mental Health Changes, Risk, and Resilience During the COVID-19 Pandemic. *JAMA Netw Open*. Published September 21, 2023.

doi:10.1001/jamanetworkopen.2023.35016

### Data

**Data available:** Yes

**Data types:** Deidentified participant data, Data dictionary

**How to access data:** Information about accessing data is set out on our study website

<https://myriadproject.org>

**When available:** With publication

### Supporting Documents

**Document types:** None

### Additional Information

**Who can access the data:** Those making an appropriate application as set out on our website.

**Types of analyses:** Those with a clear research rationale that do not duplicate existing work or work in progress.

**Mechanisms of data availability:** Data are available on reasonable request. The de-identified baseline data and codebook from the MYRIAD trial are available from Prof Kuyken ([willem.kuyken@psych.ox.ac.uk](mailto:willem.kuyken@psych.ox.ac.uk)) on request (release of data is subject to an approved proposal and a signed data access agreement).
